# Supplementary material
Source: publisher figshare collection journal article supplement (https://karger.figshare.com/ndownloader/files/8707573)

## Supplemental figure legends

**Supplemental figure 1** Expression of c-Fos in the GG of CNGA3-heterozygous animals upon stimulation with 2,3-DMP.

**A-B** In the absence of 2,3-DMP, in the GG of wild-type (CNGA3<sup>+/+</sup>) or CNGA3-heterozygous (CNGA3<sup>+/-</sup>) pups which were kept in sealed plastic boxes, no expression of c-Fos was visualized by in situ-hybridization with an antisense probe for c-Fos. **C-D** Upon exposure to 2,3-DMP for 1 h, c-Fos expression was clearly detectable in both CNGA3<sup>+/+</sup> (C) and CNGA3<sup>+/-</sup> (D) individuals albeit the signals appeared to be somewhat weaker in heterozygous pups. All figures depicted are representative of 6 independent experiments. For each of these experiments, a “novel” litter was used. Scale bars: 50  $\mu$ m. **E** Quantification of the c-Fos-positive GG cells in CNGA3<sup>+/+</sup> and CNGA3<sup>+/-</sup> pups after exposure to 2,3-DMP for 1 h. The results shown are derived from 6 experiments. In each of these experiments, the number of c-Fos-positive cells in the GG of a CNGA3<sup>+/-</sup> mouse was determined relative to that in a concomitantly processed CNGA3<sup>+/+</sup> pup; the latter was set as 100 %. A mean of values, the standard deviation and the P value were calculated. The P value is 0.0823, indicating that there are no statistically significant differences between CNGA3<sup>+/+</sup> and CNGA3<sup>+/-</sup> pups.

**Supplemental figure 2** The guanylyl cyclase domain of GC-G is absent from the GG of GC-G<sup>-/-</sup> individuals.

**A-B** Immunohistochemical staining on coronal sections through the GG of a wild-type (A) and a GC-G<sup>-/-</sup> pup (B) with an antibody specific for the C-terminal region of GC-G which comprises the guanylyl cyclase domain. Performing immunostaining with this GC-G antibody on sections through the GG of a GC-G<sup>-/-</sup> individual, no

labeled cells were detectable (B). In wild-type conspecifics, staining was detectable in GG cells - in particular in filiform subcellular structures (A). Sections were counterstained with propidium iodide. Scale bars: 20  $\mu\text{m}$ .

**Supplemental figure 3** Expression of OMP, V2r83, and CNGA3 is similar in the GG of GC-G<sup>+/+</sup> and GC-G<sup>-/-</sup> pups.

**A–F** In situ-hybridization with antisense riboprobes specific for OMP (A-B), V2r83 (C-D) and CNGA3 (E-F) labeled numerous cells in the GG of neonatal GC-G<sup>+/+</sup> (left panel) and GC-G<sup>-/-</sup> (right panel) pups. Scale bars: 50  $\mu\text{m}$ .

**Supplemental figure 4** 2,3-DMP-induced c-Fos expression in the GG of GC-G-heterozygous individuals.

**A–B** On coronal sections through the GG of wild-type (GC-G<sup>+/+</sup>) or GC-G-heterozygous (GC-G<sup>+/-</sup>) pups which were kept in sealed plastic boxes without 2,3-DMP, no expression of c-Fos was observable by in situ-hybridization using an antisense probe for c-Fos. **C–D** Following exposure to 2,3-DMP for 1 h, c-Fos expression was detectable in both GC-G<sup>+/+</sup> (C) and GC-G<sup>+/-</sup> (D) individuals; however, the signals in heterozygous animals seemed to be weaker. All data shown are representative of 5 independent experiments. For each of these experiments, a “novel” litter was used. Scale bars: 50  $\mu\text{m}$ . **E** Quantification of the c-Fos-positive GG cells in GC-G<sup>+/+</sup> and GC-G<sup>+/-</sup> pups upon exposure to 2,3-DMP for 1 h. The results are based on 4 experiments. In each experiment, the number of c-Fos-positive GG cells in a GC-G<sup>+/-</sup> pup was determined relative to that in a concomitantly processed GC-G<sup>+/+</sup> conspecific, which was set as 100 %. A mean of values, the standard deviation and the P value were calculated (P value: 0.0005).

## Supplemental figure 1

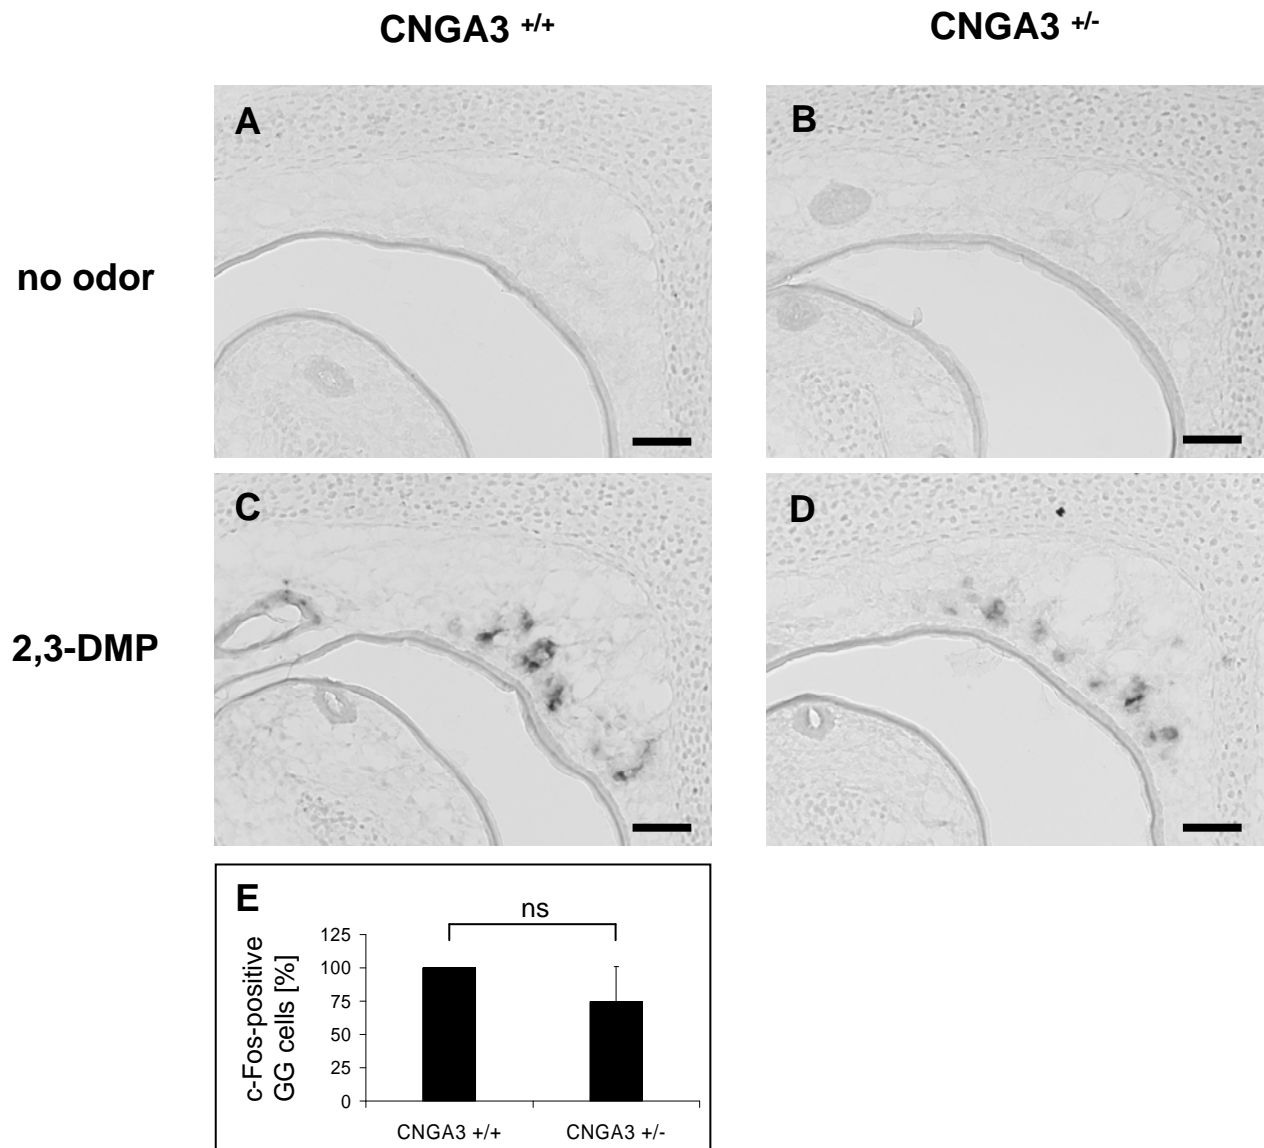

## Supplemental figure 2

**GC-G  $^{+/+}$**

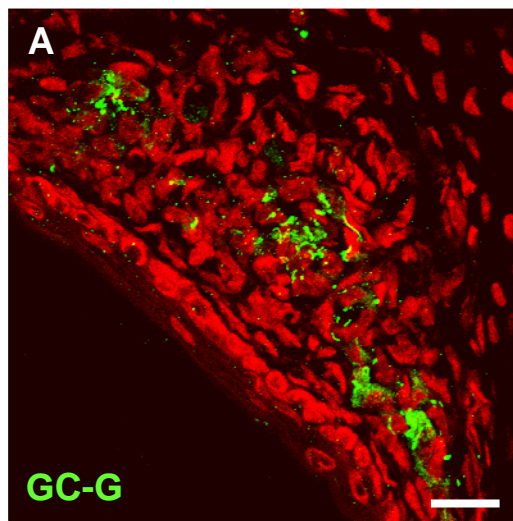

**GC-G  $^{-/-}$**

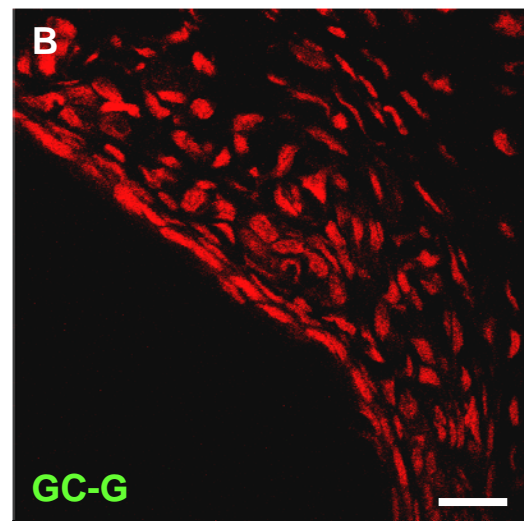

## Supplemental figure 3

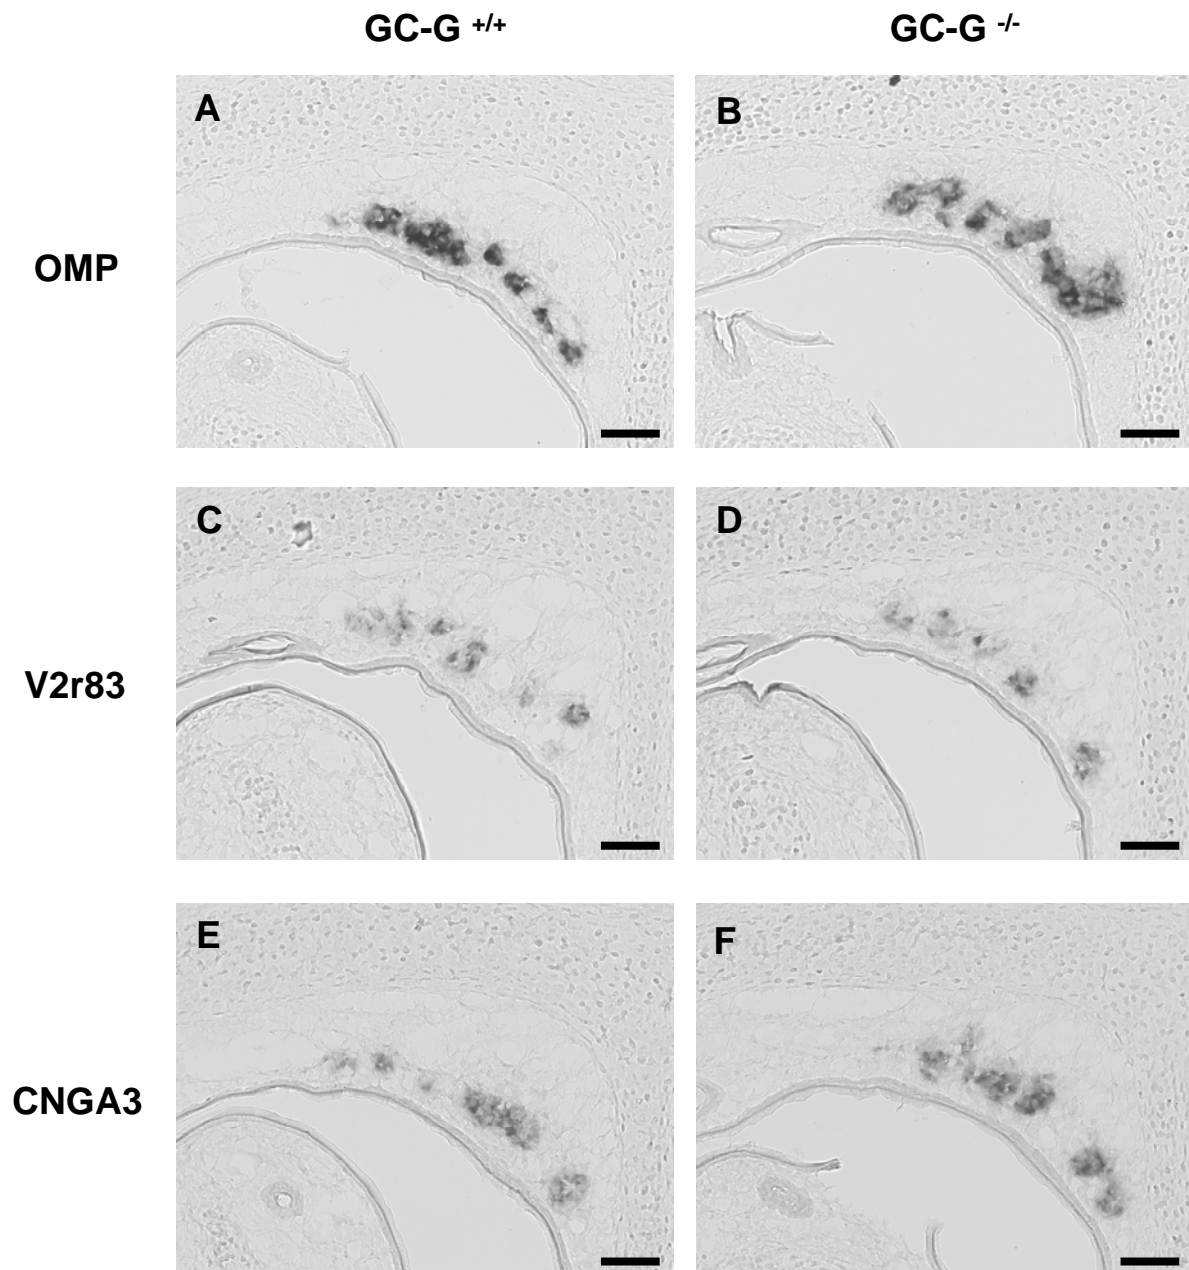

## Supplemental figure 4

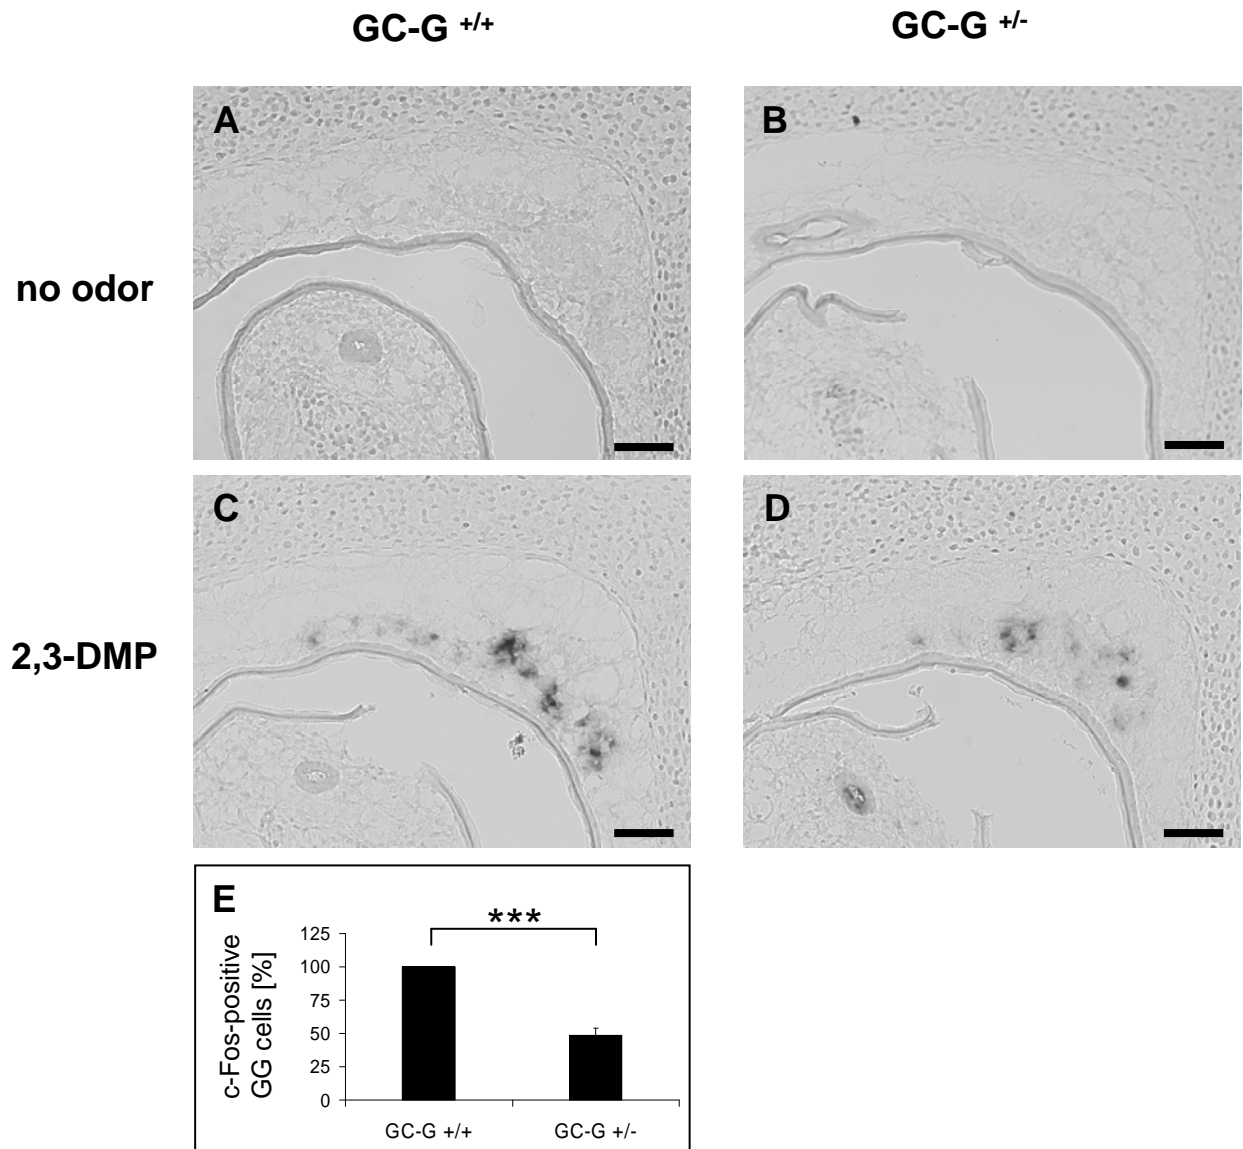

Supplement: Supplementary file 1 [file 8707573]
